# Supplementary material
Source: Springer Nature journal article supplement (https://www.springermedizin.de/resource/supplementary/13058_2011_2936_MOESM5_ESM.pdf/9702920)

**(A)**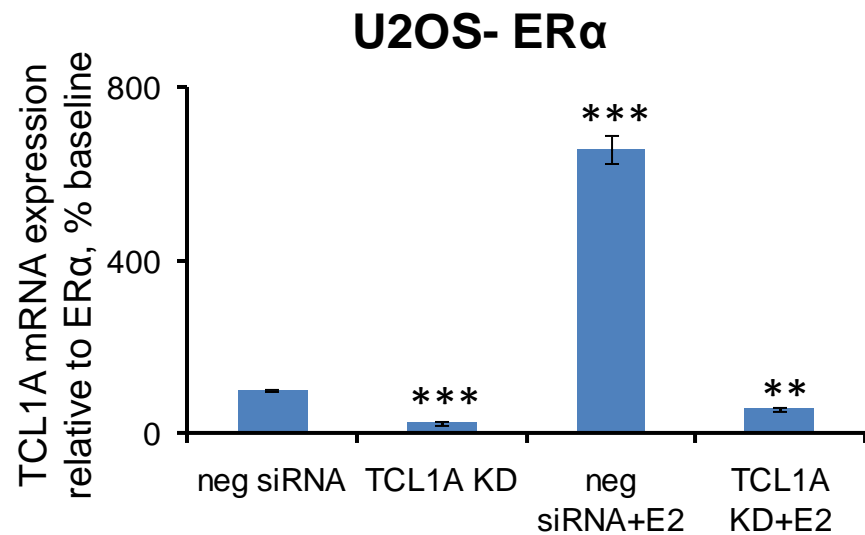**(B)**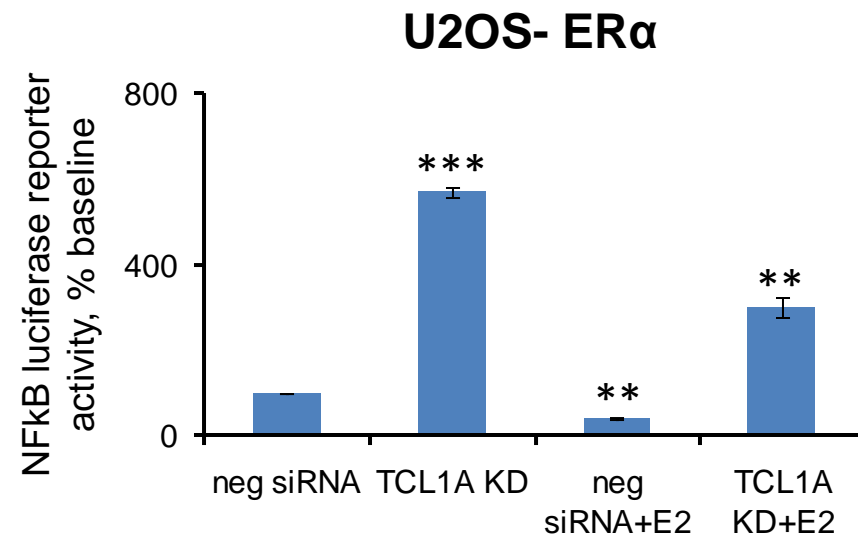**(C)**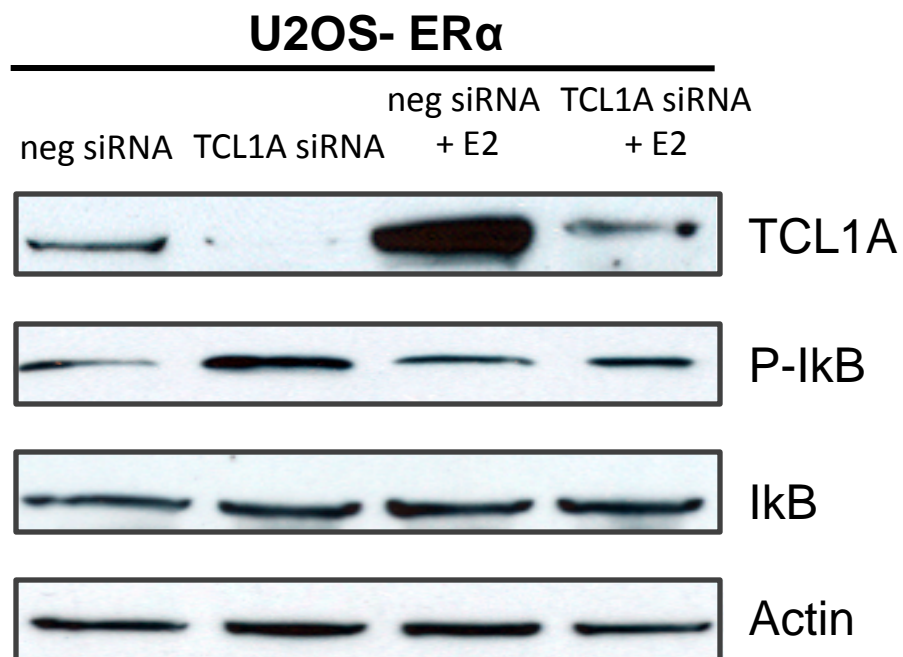

\*\* P < 0.01  
\*\*\* P < 0.001  
vs neg siRNA value

Supplement: MOESM5 [file 9702920]
